# Supplementary material for: Deep-Learning Algorithms for Prescribing Insoles to Patients with Foot Pain
Source: MDPI journal article supplement (doi:10.3390/app13042208), 2023-02-09
Supplement: s1 [file s1]

## Supplementary Materials: Source codes of DNN models

### 1. Prescription left DNN regression model

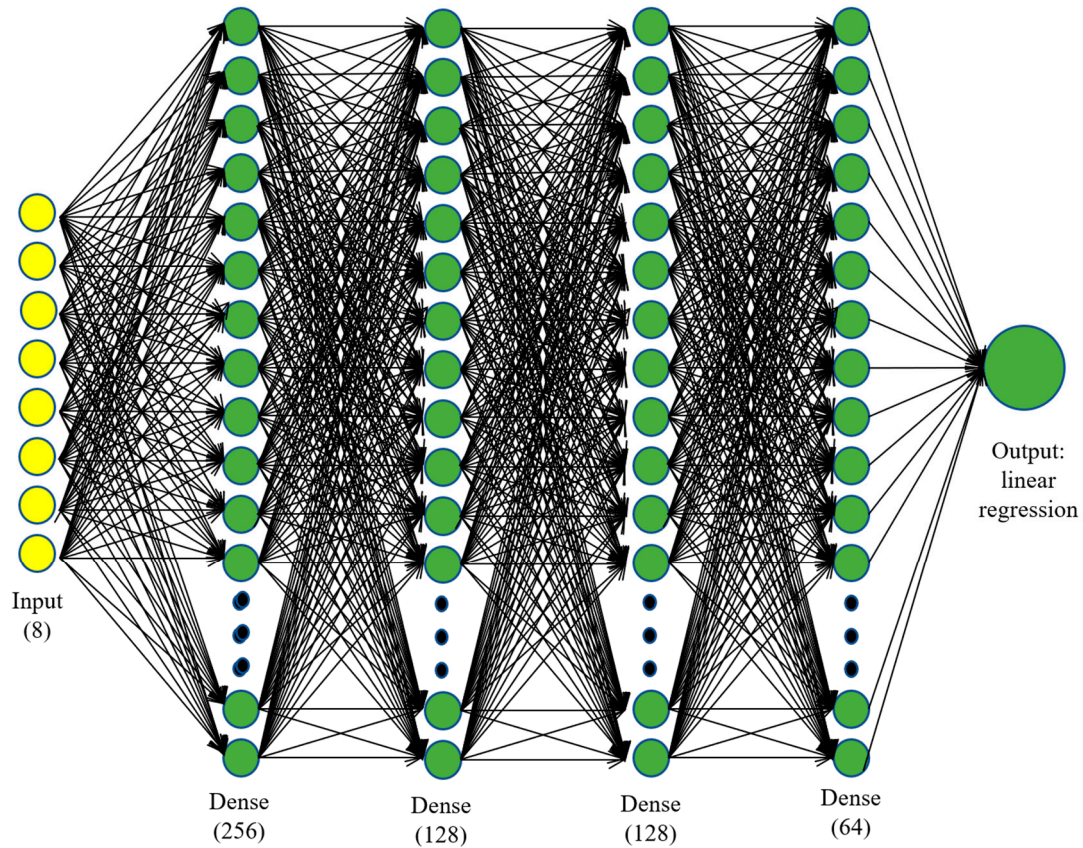

```
inputs = Input(shape=(8,), name="input")
x = Dense(256, activation="relu")(inputs)
x = BatchNormalization()(x)
x = Dense(128, activation="relu")(x)
x = BatchNormalization()(x)
x = Dense(128, activation="relu")(x)
x = BatchNormalization()(x)
x = Dense(64, activation="relu")(x)
x = BatchNormalization()(x)
output = Dense(1, activation="linear", dtype='float32')(x)
model = keras.Model(inputs, output)
```

## 2. Prescription right DNN regression model

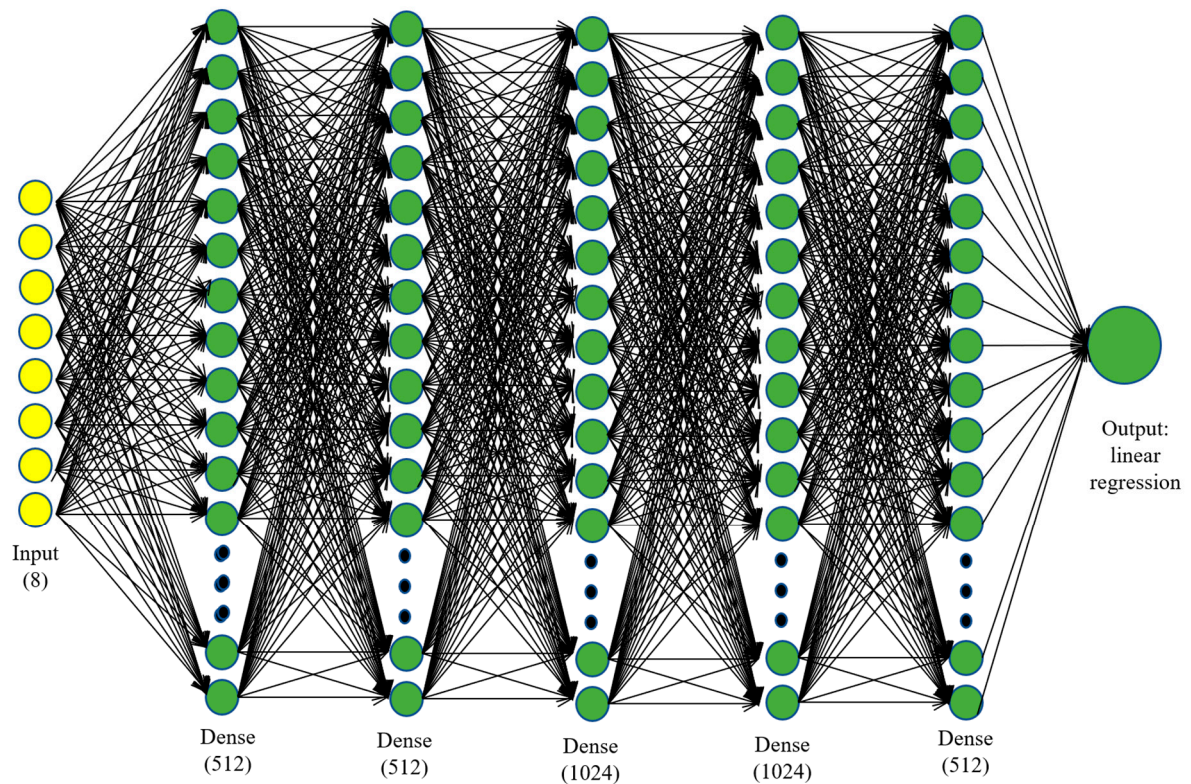

```
inputs = Input(shape=(8,), name="input")
x = Dense(512, activation="relu")(inputs)
x = BatchNormalization()(x)
x = Dense(512, activation="relu")(x)
x = BatchNormalization()(x)
x = Dense(1024, activation="relu")(x)
x = BatchNormalization()(x)
x = Dense(1024, activation="relu")(x)
x = BatchNormalization()(x)
x = Dense(512, activation="relu")(x)
x = BatchNormalization()(x)
output = Dense(1, activation="linear", dtype='float32')(x)
model = keras.Model(inputs, output)
```



### 3. Heel lift DNN model

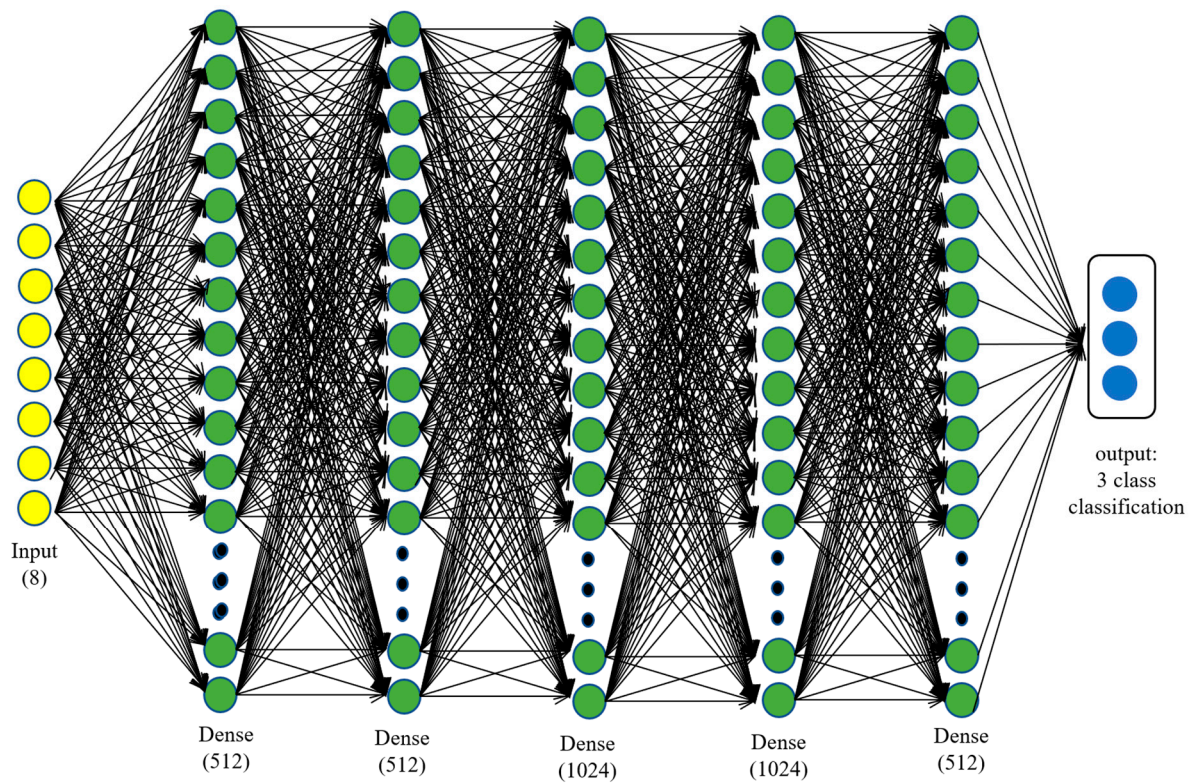

```
inputs = Input(shape=(8,), name="input")
x = Dense(512, activation="relu")(inputs)
x = Dense(512, activation="relu")(x)
x = Dense(1024, activation="relu")(x)
x = Dense(1024, activation="relu")(x)
x = Dense(512, activation="relu")(x)
x = Dropout(0.5)(x)
output = Dense(3, activation="softmax", dtype='float32')(x)
model = keras.Model(inputs, output)
```

#### 4. Entire lift DNN model

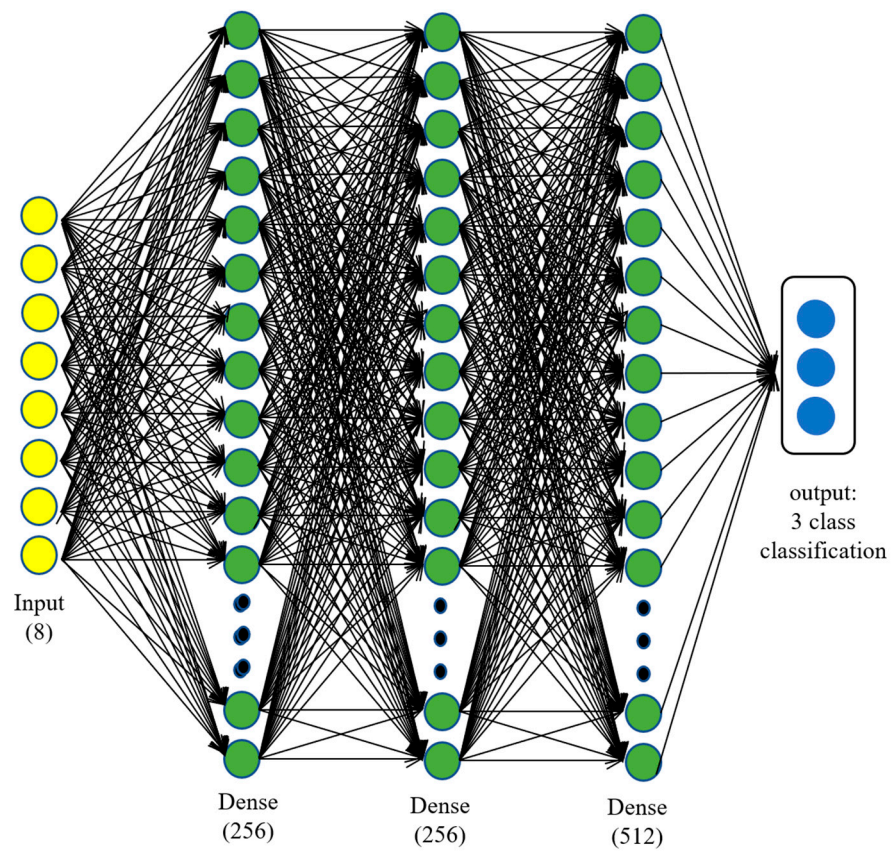

```
inputs = Input(shape=(8,), name="input")
x = Dense(256, activation="relu")(inputs)
x = Dense(256, activation="relu")(x)
x = Dense(512, activation="relu")(x)
x = Dropout(0.4)(x)
output = Dense(3, activation="softmax", dtype='float32')(x)
model = keras.Model(inputs, output)
```

## 5. Lateral wedge DNN model

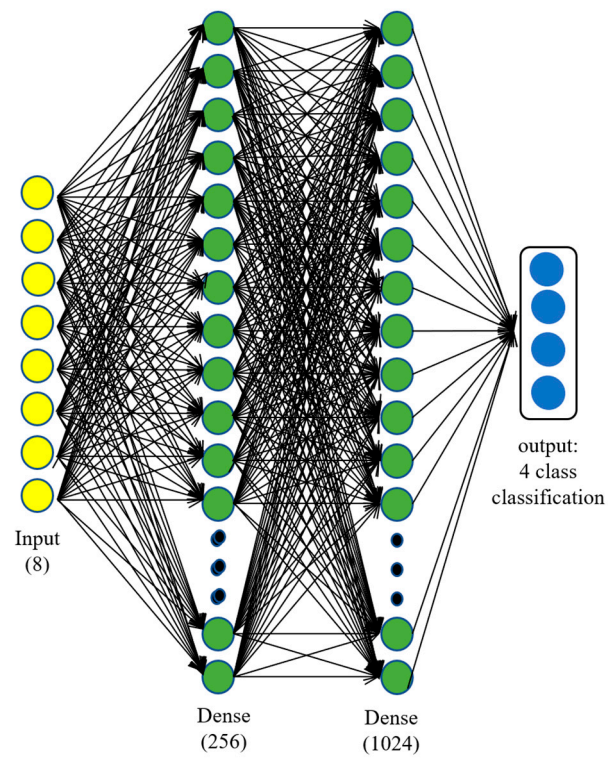

```
inputs = Input(shape=(8,), name="input")
x = Dense(256, activation="relu")(inputs)
x = Dense(1024, activation="relu")(x)
x = Dropout(0.3)(x)
output = Dense(4, activation="softmax", dtype='float32')(x)
model = keras.Model(inputs, output)
```

## 6. Medial wedge DNN model



```
inputs = Input(shape=(8,), name="input")
x = Dense(256, activation="relu")(inputs)
x = Dense(1024, activation="relu")(x)
x = Dropout(0.4)(x)
output = Dense(4, activation="softmax", dtype='float32')(x)
model = keras.Model(inputs, output)
```



## 7. Calcaneocuboid arch DNN model

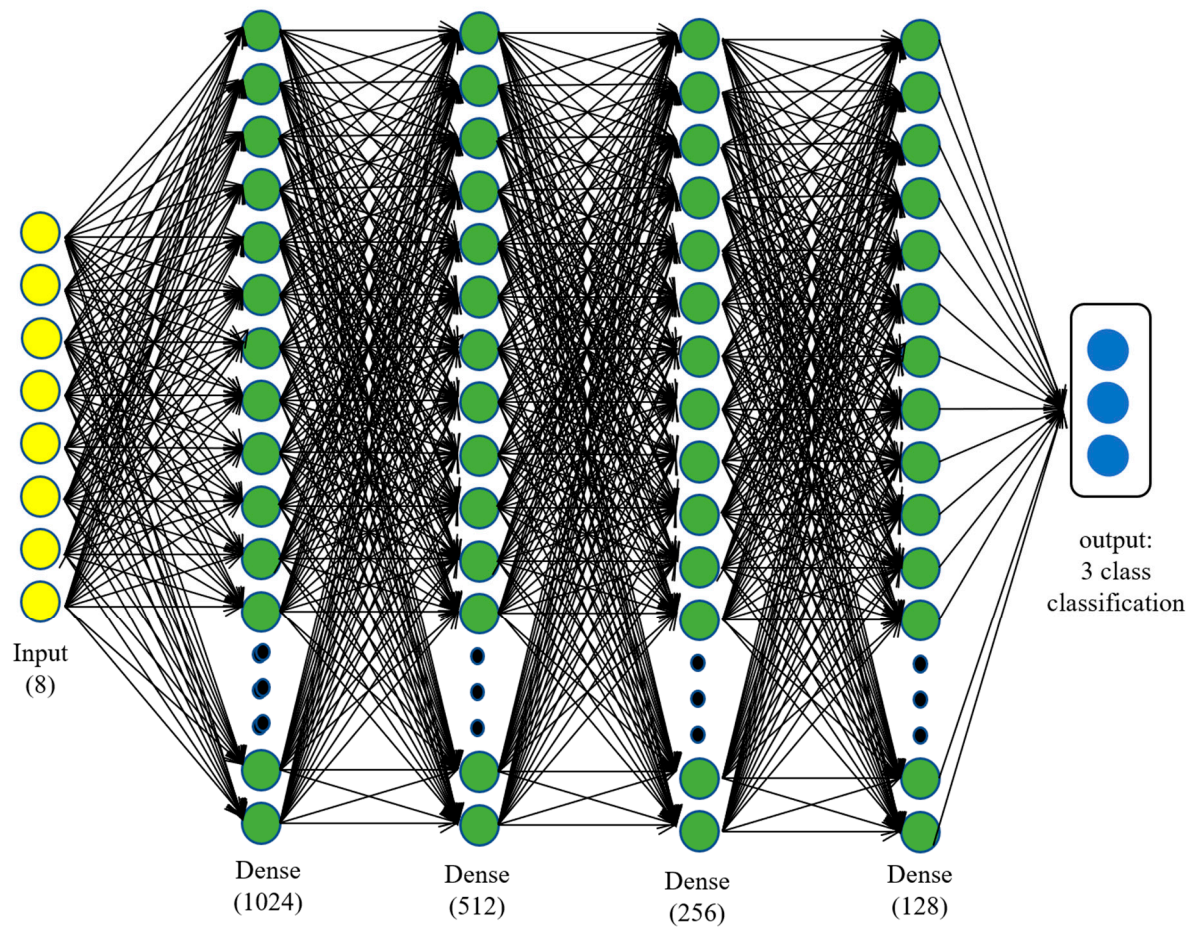

```
inputs = Input(shape=(8,), name="input")
x = Dense(1024, activation="relu")(inputs)
x = Dense(512, activation="relu")(x)
x = Dense(256, activation="relu")(x)
x = Dense(128, activation="relu")(x)
x = Dropout(0.4)(x)
output = Dense(, activation="softmax", dtype='float32')(x)
model = keras.Model(inputs, output)
```
